# Supplementary material for: QSAR-based molecular signatures of prenylated (iso)flavonoids underlying antimicrobial potency against and membrane-disruption in Gram positive and Gram negative bacteria
Source: PubMed Central journal article supplement (PMC6006161; doi:10.1038/s41598-018-27545-4), 2018-06-18
Supplement: 41598_2018_27545_MOESM1_ESM.pdf [file 41598_2018_27545_MOESM1_ESM.pdf]

**QSAR-based molecular signatures of prenylated (iso)flavonoids underlying antimicrobial potency against and membrane-disruption in Gram positive and Gram negative bacteria**

Carla Araya-Cloutier, Jean-Paul Vincken, Milou G.M. van de Schans, Jos Hageman, Gijs Schaftenaar, Heidy M.W. den Besten, Harry Gruppen

Supplementary information

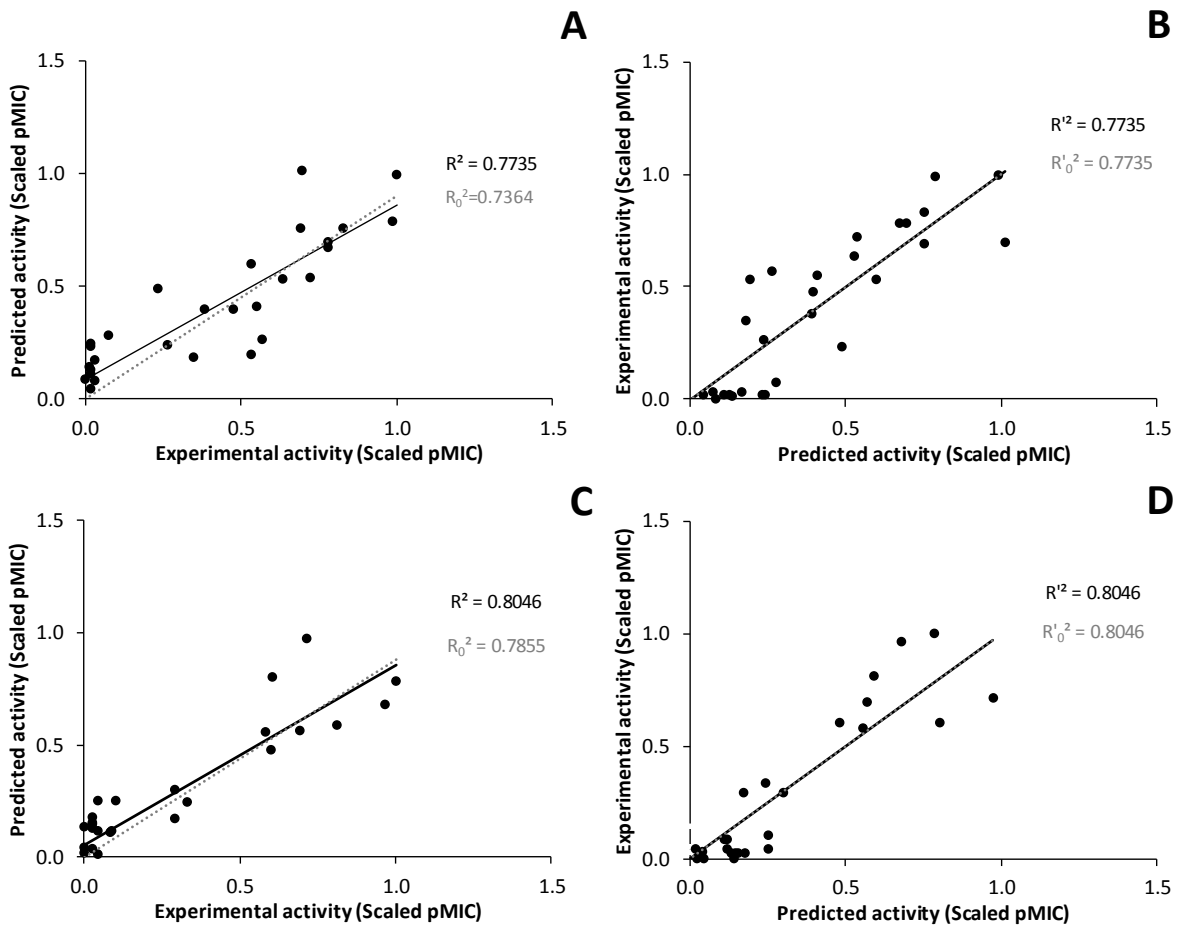

**Figure S1.** Experimental vs predicted activity by the *L. monocytogenes* (A-B) and *E. coli* (C-D) models shown in **Table 4**. Plots used for calculation of the  $R_m^2$  metric, where  $R^2$  and  $R_0^2$  represent the correlation coefficients obtained after switching the  $x$  and  $y$  axes, with and without intercept respectively.

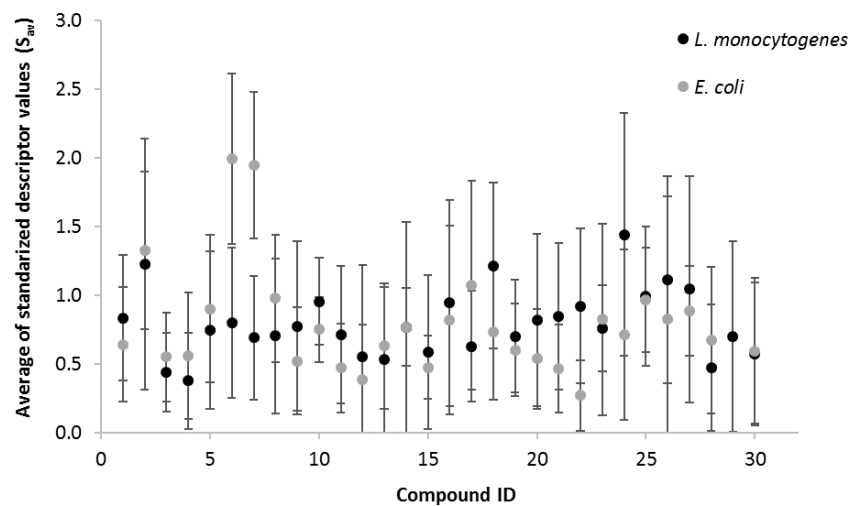

**Figure S2.** Applicability domain of the selected linear regression models for *L. monocytogenes* and *E. coli* (specified in **Table 4**). Average and standard deviation of the standardized values of the descriptors present in the models. Compound ID refers to the compound number as shown in **Figure 1**. As observed, all compounds showed  $S_{av} < 3.0$ , meaning no outliers were identified.

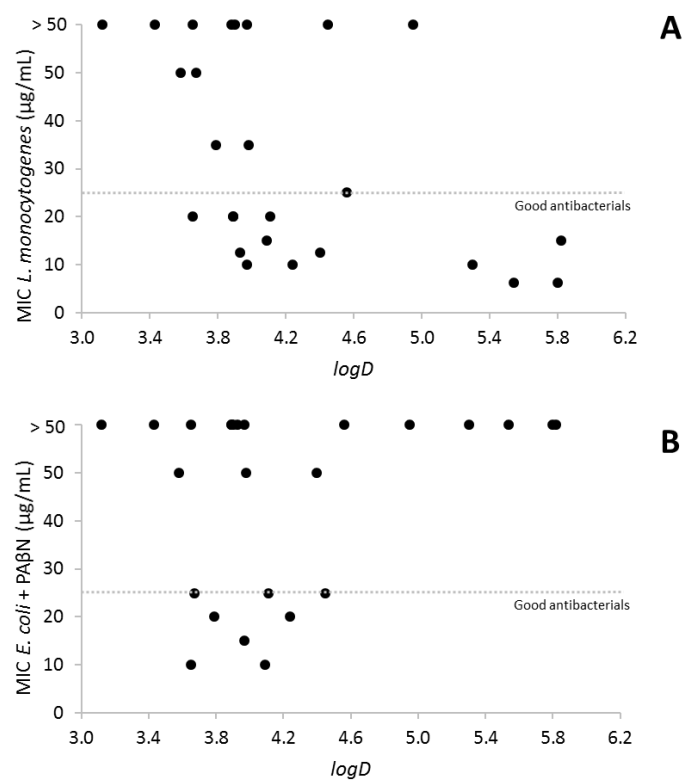

**Figure S3.** *LogD* of tested compounds (calculated at pH 7.2 using Marvin, ChemAxon) and their MIC (µg/mL) against *L. monocytogenes* (**A**) and *E. coli* with PAβN (**B**).

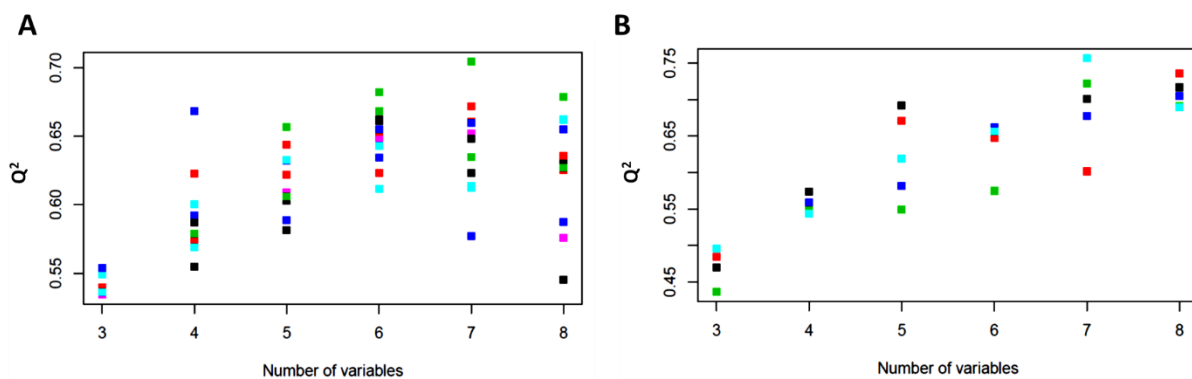

**Figure S4.** Leave-One-Out cross-validation coefficient ( $Q^2$ ) of the different runs of genetic algorithm-generated linear regression models for predicting the activity against *L. monocytogenes* (A) and *E. coli* (B). Each colour represents an independent GA run.

**Table S1.** Number of true (T) and false (F) positive (P) and negative (N) predictions by the developed pharmacophore models.

| Bacteria                | Activity <sup>a</sup> | Predicted by pharmacophore model |                   |
|-------------------------|-----------------------|----------------------------------|-------------------|
|                         |                       | antibacterial                    | non-antibacterial |
| <i>L. monocytogenes</i> | antibacterial         | 10 (TP)                          | 4 (FN)            |
|                         | non-antibacterial     | 1 (FP)                           | 15 (TN)           |
| <i>E. coli</i>          | antibacterial         | 7 (TP)                           | 1 (FN)            |
|                         | non-antibacterial     | 6 (FP)                           | 15 (TN)           |

<sup>a</sup> Threshold MIC 25 µg/mL.

**Table S2.** Compounds matching all features of the pharmacophore models of *L. monocytogenes* and *E. coli* (hits obtained by performing a pharmacophore search in MOE).

| <b><i>L. monocytogenes</i></b> | <b>RMSD<sup>a</sup></b> | <b>Result<sup>b</sup></b> |
|--------------------------------|-------------------------|---------------------------|
| 6,8-Diprenylgenistein          | 0.552                   | +                         |
| Hispaglabridin B               | 0.531                   | +                         |
| 4'-O-methyl-glabridin          | 0.502                   | +                         |
| Wighteone                      | 0.551                   | +                         |
| 3'-OH-4'-O-methyl-glabridin    | 0.506                   | +                         |
| Hispaglabridin A               | 0.522                   | +                         |
| Glabridin                      | 0.482                   | +                         |
| Luteone                        | 0.572                   | +                         |
| Dehydroglyceollin I            | 0.698                   | +                         |
| Dehydroglyceollin IV           | 0.788                   | +                         |
| Glyceollin I                   | 0.572                   | -                         |
| <b><i>E. coli</i></b>          | <b>rmsd</b>             | <b>Result</b>             |
| Luteone                        | 0.727                   | +                         |
| Glabridin                      | 0.575                   | +                         |
| Wighteone                      | 0.787                   | +                         |
| Licoisoflavone A               | 1.058                   | +                         |
| 4'-O-methyl-glabridin          | 0.559                   | +                         |
| 6-Prenyl-naringenin            | 0.926                   | +                         |
| Neobavaisoflavone              | 1.020                   | +                         |
| 6,8-Diprenyl-genistein         | 0.694                   | -                         |
| Hispaglabridin A               | 0.507                   | -                         |
| Hispaglabridin B               | 0.505                   | -                         |
| 3'-OH-4'-O-methyl-glabridin    | 0.522                   | -                         |
| Glyceollin I                   | 0.540                   | -                         |
| Dehydroglyceollin I            | 0.497                   | -                         |

<sup>a</sup> Root mean standard deviation of the molecule from the model. <sup>b</sup> True positive (+), false positive (-).

**Table S3.** List of molecular descriptors calculated by MOE (ChemAxon) and used the QSAR analysis.

| No. | Name              | Description                                                                                                                                                                                                                                                                                                                                                                         |
|-----|-------------------|-------------------------------------------------------------------------------------------------------------------------------------------------------------------------------------------------------------------------------------------------------------------------------------------------------------------------------------------------------------------------------------|
| 1   | a_acc             | Number of hydrogen bond acceptor atoms.                                                                                                                                                                                                                                                                                                                                             |
| 2   | a_don             | Number of hydrogen bond donor atoms.                                                                                                                                                                                                                                                                                                                                                |
| 3   | a_donacc          | Number of hydrogen bond donor and acceptor atoms.                                                                                                                                                                                                                                                                                                                                   |
| 4   | a_hyd             | Number of hydrophobic atoms.                                                                                                                                                                                                                                                                                                                                                        |
| 5   | a_IC              | Atom information content (total).                                                                                                                                                                                                                                                                                                                                                   |
| 6   | a_ICM             | Atom information content (mean). This is the entropy of the element distribution in the molecule (including implicit hydrogens but not lone pair pseudo-atoms). Let $n_i$ be the number of occurrences of atomic number $i$ in the molecule. Let $p_i = n_i / n$ where $n$ is the sum of the $n_i$ . The value of a_ICM is the negative of the sum over all $i$ of $p_i \log p_i$ . |
| 7   | a_nC              | Number of carbon atoms.                                                                                                                                                                                                                                                                                                                                                             |
| 8   | a_nH              | Number of hydrogen atoms (including implicit hydrogens). This is calculated as the sum of $h_i$ over all non-trivial atoms $i$ plus the number of non-trivial hydrogen atoms.                                                                                                                                                                                                       |
| 9   | a_nO              | Number of oxygen atoms.                                                                                                                                                                                                                                                                                                                                                             |
| 10  | AM1_dipole        | The dipole moment calculated using the AM1 Hamiltonian [MOPAC].                                                                                                                                                                                                                                                                                                                     |
| 11  | AM1_HF            | The heat of formation (kcal/mol) calculated using the AM1 Hamiltonian.                                                                                                                                                                                                                                                                                                              |
| 12  | AM1_HOMO          | The energy (eV) of the Highest Occupied Molecular Orbital calculated using the AM1 Hamiltonian.                                                                                                                                                                                                                                                                                     |
| 13  | AM1_IP            | Ionization potential (eV) calculated using the AM1 Hamiltonian.                                                                                                                                                                                                                                                                                                                     |
| 14  | AM1_LUMO          | The energy (eV) of the Lowest Unoccupied Molecular Orbital calculated using the AM1 Hamiltonian.                                                                                                                                                                                                                                                                                    |
| 15  | apol              | Sum of the atomic polarizabilities.                                                                                                                                                                                                                                                                                                                                                 |
| 16  | ASA               | Water accessible surface area calculated using a radius of 1.4 Å for the water molecule.                                                                                                                                                                                                                                                                                            |
| 17  | ASA-              | Water accessible surface area of all atoms with negative partial charge.                                                                                                                                                                                                                                                                                                            |
| 18  | ASA_H             | Water accessible surface area of all hydrophobic ( $ q_i  < 0.2$ ) atoms.                                                                                                                                                                                                                                                                                                           |
| 19  | ASA_P             | Water accessible surface area of all polar ( $ q_i  \geq 0.2$ ) atoms.                                                                                                                                                                                                                                                                                                              |
| 20  | ASA+              | Water accessible surface area of all atoms with positive partial charge.                                                                                                                                                                                                                                                                                                            |
| 21  | ast_violation     | Astex fragment-like violation count                                                                                                                                                                                                                                                                                                                                                 |
| 22  | ast_violation_ext | Astex fragment-like violation count (extended)                                                                                                                                                                                                                                                                                                                                      |
| 23  | b_count           | Number of bonds (including implicit hydrogens).                                                                                                                                                                                                                                                                                                                                     |
| 24  | b_double          | Number of double bonds.                                                                                                                                                                                                                                                                                                                                                             |
| 25  | b_heavy           | Number of bonds between heavy atoms.                                                                                                                                                                                                                                                                                                                                                |
| 26  | b_rotN            | Number of rotatable bonds. A bond is rotatable if it is not in a ring, and neither atom of the bond is such that $(d_i + h_i) < 2$ .                                                                                                                                                                                                                                                |
| 27  | b_single          | Number of single bonds (including implicit hydrogens).                                                                                                                                                                                                                                                                                                                              |
| 28  | balabanJ          | Balaban's connectivity topological index.                                                                                                                                                                                                                                                                                                                                           |
| 29  | bpol              | Sum of the absolute value of the difference between atomic polarizabilities of all bonded atoms in the molecule.                                                                                                                                                                                                                                                                    |
| 30  | CASA-             | Negative charge weighted surface area, ASA- times $\max\{q_i < 0\}$ .                                                                                                                                                                                                                                                                                                               |
| 31  | CASA+             | Positive charge weighted surface area, ASA+ times $\max\{q_i > 0\}$ .                                                                                                                                                                                                                                                                                                               |
| 32  | chi0              | Atomic connectivity index (order 0). This is calculated as the sum of $1/\sqrt{d_i}$ over all heavy atoms $i$ with $d_i > 0$ .                                                                                                                                                                                                                                                      |
| 33  | chi1_C            | Carbon connectivity index (order 1). This is calculated as the sum of $1/\sqrt{d_i d_j}$ over all bonds between carbon atoms $i$ and $j$ where $i < j$ .                                                                                                                                                                                                                            |
| 34  | chi1v             | Atomic valence connectivity index (order 1). This is calculated as the sum of $1/\sqrt{v_i v_j}$ over all bonds between heavy atoms $i$ and $j$ where $i < j$ .                                                                                                                                                                                                                     |
| 35  | chi1v_C           | Carbon valence connectivity index (order 1). This is calculated as the sum of $1/\sqrt{v_i v_j}$ over all bonds between carbon atoms $i$ and $j$ where $i < j$ .                                                                                                                                                                                                                    |
| 36  | LogD <sup>a</sup> | Distribution coefficient at pH 7.2.                                                                                                                                                                                                                                                                                                                                                 |
| 37  | DASA              | Absolute value of the difference between ASA+ and ASA-.                                                                                                                                                                                                                                                                                                                             |



|    |               |                                                                                                                                                                   |
|----|---------------|-------------------------------------------------------------------------------------------------------------------------------------------------------------------|
| 38 | DCASA         | Absolute value of the difference between CASA+ and CASA-.                                                                                                         |
| 39 | dens          | Mass density: molecular weight divided by van der Waals volume.                                                                                                   |
| 40 | diameter      | Largest value in the distance matrix.                                                                                                                             |
| 41 | dipole        | Dipole moment calculated from the partial charges of the molecule.                                                                                                |
| 42 | FASA-         | Fractional ASA- calculated as ASA- / ASA.                                                                                                                         |
| 43 | FASA_H        | Fractional ASA_H calculated as ASA_H / ASA.                                                                                                                       |
| 44 | FASA_P        | Fractional ASA_P calculated as ASA_P / ASA.                                                                                                                       |
| 45 | FASA+         | Fractional ASA+ calculated as ASA+ / ASA.                                                                                                                         |
| 46 | FCASA-        | Fractional CASA- calculated as CASA- / ASA.                                                                                                                       |
| 47 | FCASA+        | Fractional CASA+ calculated as CASA+ / ASA.                                                                                                                       |
| 48 | glob          | Globularity.                                                                                                                                                      |
| 49 | h_ema         | Sum of hydrogen bond acceptor strengths.                                                                                                                          |
| 50 | h_emd         | Sum of hydrogen bond donor strengths.                                                                                                                             |
| 51 | h_emd_C       | Sum of hydrogen bond donor strengths of carbon atoms.                                                                                                             |
| 52 | h_log_pbo     | Sum of log (1+ pi bond order) for all bonds.                                                                                                                      |
| 53 | h_logD        | The octanol/water coefficient at pH 7.0.                                                                                                                          |
| 54 | h_logS        | Log of the aqueous solubility (mol/L).                                                                                                                            |
| 55 | h_pavgQ       | Average total charge.                                                                                                                                             |
| 56 | h_pKa         | pKa.                                                                                                                                                              |
| 57 | Kier1         | First kappa shape index: $(n-1)^2 / m^2$ .                                                                                                                        |
| 58 | Kier2         | Second kappa shape index: $(n-1)^2 / m^2$ .                                                                                                                       |
| 59 | Kier3         | Third kappa shape index: $(n-1)(n-3)^2 / p_3^2$ for odd $n$ , and $(n-3)(n-2)^2 / p_3^2$ for even $n$ .                                                           |
| 60 | KierA1        | First alpha modified shape index: $s(s-1)^2 / m^2$ where $s = n + a$ .                                                                                            |
| 61 | KierA2        | Second alpha modified shape index: $s(s-1)^2 / m^2$ where $s = n + a$ .                                                                                           |
| 62 | KierA3        | Third alpha modified shape index: $(n-1)(n-3)^2 / p_3^2$ for odd $n$ , and $(n-3)(n-2)^2 / p_3^2$ for even $n$ where $s = n + a$ .                                |
| 63 | KierFlex      | Kier molecular flexibility index: $(KierA1)(KierA2) / n$ .                                                                                                        |
| 64 | logP(o/w)     | Log of the octanol/water partition coefficient (including implicit hydrogens).                                                                                    |
| 65 | logS          | Log of the aqueous solubility (mol/L).                                                                                                                            |
| 66 | MNDO_dipole   | The dipole moment calculated using the MNDO Hamiltonian.                                                                                                          |
| 67 | MNDO_HF       | The heat of formation (kcal/mol) calculated using the MNDO Hamiltonian.                                                                                           |
| 68 | MNDO_HOMO     | The energy (eV) of the Highest Occupied Molecular Orbital calculated using the MNDO Hamiltonian.                                                                  |
| 69 | MNDO_IP       | Ionization potential (eV) calculated using the MNDO Hamiltonian.                                                                                                  |
| 70 | MNDO_LUMO     | The energy (eV) of the Lowest Unoccupied Molecular Orbital calculated using the MNDO Hamiltonian.                                                                 |
| 71 | npr1          | Normalized PMI ratio $p_{mi1}/p_{mi3}$ .                                                                                                                          |
| 72 | npr2          | Normalized PMI ratio $p_{mi2}/p_{mi3}$ .                                                                                                                          |
| 73 | opr_brigid    | The number of rigid bonds.                                                                                                                                        |
| 74 | opr_nrot      | The number of rotatable bonds.                                                                                                                                    |
| 75 | PC-           | Total negative partial charge                                                                                                                                     |
| 76 | PC+           | Total positive partial charge                                                                                                                                     |
| 77 | PEOE_PC-      | Total negative partial charge: the sum of the negative $q_i$ .                                                                                                    |
| 78 | PEOE_PC+      | Relative positive partial charge: the largest positive $q_i$ divided by the sum of the positive $q_i$ .                                                           |
| 79 | PEOE_RPC-     | Relative negative partial charge: the smallest negative $q_i$ divided by the sum of the negative $q_i$ .                                                          |
| 80 | PEOE_RPC+     | Relative positive partial charge: the largest positive $q_i$ divided by the sum of the positive $q_i$ .                                                           |
| 81 | PEOE_VSA_FHYD | Fractional hydrophobic van der Waals surface area. This is the sum of the $v_i$ such that $ q_i $ is less than or equal to 0.2 divided by the total surface area. |

|     |                |                                                                                                                                                          |
|-----|----------------|----------------------------------------------------------------------------------------------------------------------------------------------------------|
| 82  | PEOE_VSA_FNEG  | Fractional negative van der Waals surface area. This is the sum of the $v_i$ such that $q_i$ is negative divided by the total surface area               |
| 83  | PEOE_VSA_FPNEG | Fractional negative polar van der Waals surface area. This is the sum of the $v_i$ such that $q_i$ is less than -0.2 divided by the total surface area.  |
| 84  | PEOE_VSA_FPOL  | Fractional polar van der Waals surface area. This is the sum of the $v_i$ such that $ q_i $ is greater than 0.2 divided by the total surface area        |
| 85  | PEOE_VSA_FPOS  | Fractional positive van der Waals surface area. This is the sum of the $v_i$ such that $q_i$ is non-negative divided by the total surface area           |
| 86  | PEOE_VSA_FPPOS | Fractional positive polar van der Waals surface area. This is the sum of the $v_i$ such that $q_i$ is greater than 0.2 divided by the total surface area |
| 87  | PEOE_VSA_HYD   | Total hydrophobic van der Waals surface area. This is the sum of the $v_i$ such that $ q_i $ is less than or equal to 0.2                                |
| 88  | PEOE_VSA_NEG   | Total negative van der Waals surface area. This is the sum of the $v_i$ such that $q_i$ is negative.                                                     |
| 89  | PEOE_VSA_PNEG  | Total negative polar van der Waals surface area. This is the sum of the $v_i$ such that $q_i$ is less than -0.2.                                         |
| 90  | PEOE_VSA_POL   | Total polar van der Waals surface area. This is the sum of the $v_i$ such that $ q_i $ is greater than 0.2.                                              |
| 91  | PEOE_VSA_POS   | Total positive van der Waals surface area. This is the sum of the $v_i$ such that $q_i$ is non-negative.                                                 |
| 92  | PEOE_VSA_PPOS  | Total positive polar van der Waals surface area. This is the sum of the $v_i$ such that $q_i$ is greater than 0.2.                                       |
| 93  | PEOE_VSA+0     | Sum of $v_i$ where $q_i$ is in the range [0.00,0.05).                                                                                                    |
| 94  | PEOE_VSA+1     | Sum of $v_i$ where $q_i$ is in the range [0.05,0.10).                                                                                                    |
| 95  | PEOE_VSA+2     | Sum of $v_i$ where $q_i$ is in the range [0.10,0.15).                                                                                                    |
| 96  | PEOE_VSA+4     | Sum of $v_i$ where $q_i$ is in the range [0.20,0.25).                                                                                                    |
| 97  | PEOE_VSA-0     | Sum of $v_i$ where $q_i$ is in the range [-0.05,0.00).                                                                                                   |
| 98  | PEOE_VSA-1     | Sum of $v_i$ where $q_i$ is in the range [-0.10,-0.05).                                                                                                  |
| 99  | PEOE_VSA-6     | Sum of $v_i$ where $q_i$ is less than -0.30.                                                                                                             |
| 100 | petitjeanSC    | Petitjean graph Shape Coefficient: (diameter - radius) / radius.                                                                                         |
| 101 | PM3_dipole     | The dipole moment calculated using the PM3 Hamiltonian.                                                                                                  |
| 102 | PM3_E          | Total energy (kcal/mol) calculated using the PM3 Hamiltonian.                                                                                            |
| 103 | PM3_HF         | The heat of formation (kcal/mol) calculated using the PM3 Hamiltonian.                                                                                   |
| 104 | PM3_HOMO       | The energy (eV) of the Highest Occupied Molecular Orbital calculated using the PM3 Hamiltonian.                                                          |
| 105 | PM3_IP         | Ionization potential (eV) calculated using the PM3 Hamiltonian.                                                                                          |
| 106 | PM3_LUMO       | The energy (eV) of the Lowest Unoccupied Molecular Orbital calculated using the PM3 Hamiltonian.                                                         |
| 107 | pmi            | Principal moment of inertia.                                                                                                                             |
| 108 | pmi1           | First (smallest) principal moment of inertia.                                                                                                            |
| 109 | pmi2           | Second principal moment of inertia.                                                                                                                      |
| 110 | pmi3           | Third (largest) principal moment of inertia.                                                                                                             |
| 111 | rgyr           | Radius of gyration.                                                                                                                                      |
| 112 | rings          | The number of rings.                                                                                                                                     |
| 113 | RPC-           | Relative negative partial charge.                                                                                                                        |
| 114 | RPC+           | Relative positive partial charge.                                                                                                                        |
| 115 | rsynth         | Synthetic reasonableness (fraction of heavy atoms that can be synthesized).                                                                              |
| 116 | SlogP          | Log of the octanol/water partition coefficient.                                                                                                          |
| 117 | SlogP_VSA0     | Sum of $v_i$ such that $L_i \leq -0.4$ .                                                                                                                 |
| 118 | SlogP_VSA4     | Sum of $v_i$ such that $L_i$ is in (0.1,0.15].                                                                                                           |
| 119 | SlogP_VSA5     | Sum of $v_i$ such that $L_i$ is in (0.15,0.20].                                                                                                          |
| 120 | SlogP_VSA7     | Sum of $v_i$ such that $L_i$ is in (0.25,0.30].                                                                                                          |
| 121 | SlogP_VSA8     | Sum of $v_i$ such that $L_i$ is in (0.30,0.40].                                                                                                          |
| 122 | SlogP_VSA9     | Sum of $v_i$ such that $L_i > 0.40$ .                                                                                                                    |

|     |              |                                                                                                                                                                  |
|-----|--------------|------------------------------------------------------------------------------------------------------------------------------------------------------------------|
| 123 | SMR          | Molecular refractivity.                                                                                                                                          |
| 124 | SMR_VSA1     | Sum of $v_i$ such that $R_i$ is in (0.11,0.26].                                                                                                                  |
| 125 | SMR_VSA3     | Sum of $v_i$ such that $R_i$ is in (0.35,0.39].                                                                                                                  |
| 126 | SMR_VSA4     | Sum of $v_i$ such that $R_i$ is in (0.39,0.44].                                                                                                                  |
| 127 | SMR_VSA5     | Sum of $v_i$ such that $R_i$ is in (0.44,0.485].                                                                                                                 |
| 128 | SMR_VSA6     | Sum of $v_i$ such that $R_i$ is in (0.485,0.56].                                                                                                                 |
| 129 | SMR_VSA7     | Sum of $v_i$ such that $R_i > 0.56$ .                                                                                                                            |
| 130 | std_dim1     | Standard dimension 1: the square root of the largest eigenvalue of the covariance matrix of the atomic coordinates.                                              |
| 131 | std_dim2     | Standard dimension 2: the square root of the second largest eigenvalue of the covariance matrix of the atomic coordinates.                                       |
| 132 | std_dim3     | Standard dimension 3: the square root of the third largest eigenvalue of the covariance matrix of the atomic coordinates.                                        |
| 133 | TPSA         | Polar surface area ( $\text{\AA}^2$ ) calculated using group contributions to approximate the polar surface area from connection table information only.         |
| 134 | vdw_area     | Area of van der Waals surface ( $\text{\AA}^2$ ) calculated using a connection table approximation.                                                              |
| 135 | vdw_vol      | van der Waals volume ( $\text{\AA}^3$ ) calculated using a connection table approximation.                                                                       |
| 136 | vsa_acc      | Approximation to the sum of VDW surface areas ( $\text{\AA}^2$ ) of pure hydrogen bond acceptors.                                                                |
| 137 | vsa_hyd      | Approximation to the sum of VDW surface areas of hydrophobic atoms ( $\text{\AA}^2$ ).                                                                           |
| 138 | vsa_pol      | Approximation to the sum of VDW surface areas ( $\text{\AA}^2$ ) of polar atoms (atoms that are both hydrogen bond donors and acceptors), such as $-\text{OH}$ . |
| 139 | vsurf_A      | Amphiphilic moment.                                                                                                                                              |
| 140 | vsurf_CP     | Critical packing parameter.                                                                                                                                      |
| 141 | vsurf_CW1    | Capacity factor is the ratio of the hydrophilic surface over the total molecular surface, calculated at $-0.2$ kcal/mol.                                         |
| 142 | vsurf_CW2    | Capacity factor at $-0.5$ kcal/mol.                                                                                                                              |
| 143 | vsurf_CW3    | Capacity factor at $-1.0$ kcal/mol.                                                                                                                              |
| 144 | vsurf_CW4    | Capacity factor at $-2.0$ kcal/mol.                                                                                                                              |
| 145 | vsurf_CW5    | Capacity factor at $-3.0$ kcal/mol.                                                                                                                              |
| 146 | vsurf_CW6    | Capacity factor at $-4.0$ kcal/mol.                                                                                                                              |
| 147 | vsurf_D1     | Hydrophobic volume at $-0.2$ kcal/mol.                                                                                                                           |
| 148 | vsurf_D3     | Hydrophobic volume at $-0.6$ kcal/mol.                                                                                                                           |
| 149 | vsurf_D4     | Hydrophobic volume at $-0.8$ kcal/mol.                                                                                                                           |
| 150 | vsurf_D5     | Hydrophobic volume at $-1.0$ kcal/mol.                                                                                                                           |
| 151 | vsurf_D6     | Hydrophobic volume at $-1.2$ kcal/mol.                                                                                                                           |
| 152 | vsurf_D7     | Hydrophobic volume at $-1.4$ kcal/mol.                                                                                                                           |
| 153 | vsurf_D8     | Hydrophobic volume at $-1.6$ kcal/mol.                                                                                                                           |
| 154 | vsurf_DD12   | Contact distances. vsurf_EDmin1, vsurf_EDmin2 distance.                                                                                                          |
| 155 | vsurf_DD13   | vsurf_EDmin1, vsurf_EDmin3 distance.                                                                                                                             |
| 156 | vsurf_DD23   | vsurf_EDmin2, vsurf_EDmin3 distance.                                                                                                                             |
| 157 | vsurf_DW12   | vsurf_EWmin1, vsurf_EWmin2 distance.                                                                                                                             |
| 158 | vsurf_DW13   | vsurf_EWmin1, vsurf_EWmin3 distance.                                                                                                                             |
| 159 | vsurf_DW23   | vsurf_EWmin2, vsurf_EWmin3 distance.                                                                                                                             |
| 160 | vsurf_EDmin1 | Lowest hydrophobic energy.                                                                                                                                       |
| 161 | vsurf_EDmin2 | Second lowest hydrophobic energy.                                                                                                                                |
| 162 | vsurf_EDmin3 | Third lowest hydrophobic energy.                                                                                                                                 |
| 163 | vsurf_EWmin1 | Lowest hydrophilic energy.                                                                                                                                       |
| 164 | vsurf_EWmin2 | Second lowest hydrophilic energy.                                                                                                                                |
| 165 | vsurf_EWmin3 | Third lowest hydrophilic energy.                                                                                                                                 |

|     |            |                                                                  |
|-----|------------|------------------------------------------------------------------|
| 166 | vsurf_G    | Surface globularity.                                             |
| 167 | vsurf_HB1  | H-bond donor capacity at -0.2 kcal/mol.                          |
| 168 | vsurf_HB2  | H-bond donor capacity at -0.5 kcal/mol.                          |
| 169 | vsurf_HB3  | H-bond donor capacity at -1.0 kcal/mol.                          |
| 170 | vsurf_HB4  | H-bond donor capacity at -2.0 kcal/mol.                          |
| 171 | vsurf_HB5  | H-bond donor capacity at -3.0 kcal/mol.                          |
| 172 | vsurf_HB6  | H-bond donor capacity at -4.0 kcal/mol.                          |
| 173 | vsurf_HB7  | H-bond donor capacity at -5.0 kcal/mol.                          |
| 174 | vsurf_HL1  | First hydrophilic-lipophilic balance.                            |
| 175 | vsurf_HL2  | Second hydrophilic-lipophilic balance.                           |
| 176 | vsurf_ID1  | Hydrophobic interaction energy (integy) moment at -0.2 kcal/mol. |
| 177 | vsurf_ID2  | Hydrophobic integy moment at -0.4 kcal/mol.                      |
| 178 | vsurf_ID3  | Hydrophobic integy moment at -0.6 kcal/mol.                      |
| 179 | vsurf_ID4  | Hydrophobic integy moment at -0.8 kcal/mol.                      |
| 180 | vsurf_ID5  | Hydrophobic integy moment at -1.0 kcal/mol.                      |
| 181 | vsurf_ID6  | Hydrophobic integy moment at -1.2 kcal/mol.                      |
| 182 | vsurf_ID7  | Hydrophobic integy moment at -1.4 kcal/mol.                      |
| 183 | vsurf_ID8  | Hydrophobic integy moment at -1.6 kcal/mol.                      |
| 184 | vsurf_IW1  | Hydrophilic integy moment at -0.2 kcal/mol.                      |
| 185 | vsurf_IW2  | Hydrophilic integy moment at -0.5 kcal/mol.                      |
| 186 | vsurf_IW3  | Hydrophilic integy moment at -1.0 kcal/mol.                      |
| 187 | vsurf_IW4  | Hydrophilic integy moment at -2.0 kcal/mol.                      |
| 188 | vsurf_IW5  | Hydrophilic integy moment at -3.0 kcal/mol.                      |
| 189 | vsurf_IW6  | Hydrophilic integy moment at -4.0 kcal/mol.                      |
| 190 | vsurf_IW7  | Hydrophilic integy moment at -5.0 kcal/mol.                      |
| 191 | vsurf_R    | Surface rugosity.                                                |
| 192 | vsurf_S    | Interaction field area.                                          |
| 193 | vsurf_V    | Interaction field volume.                                        |
| 194 | vsurf_W1   | Hydrophilic volume at -0.2 kcal/mol.                             |
| 195 | vsurf_W2   | Hydrophilic volume at -0.5 kcal/mol.                             |
| 196 | vsurf_W3   | Hydrophilic volume at -1.0 kcal/mol.                             |
| 197 | vsurf_W4   | Hydrophilic volume at -2.0 kcal/mol.                             |
| 198 | vsurf_W5   | Hydrophilic volume at -3.0 kcal/mol.                             |
| 199 | vsurf_W6   | Hydrophilic volume at -4.0 kcal/mol.                             |
| 200 | vsurf_W7   | Hydrophilic volume at -5.0 kcal/mol.                             |
| 201 | vsurf_Wp1  | Polar volume at -0.2 kcal/mol.                                   |
| 202 | vsurf_Wp2  | Polar volume at -0.5 kcal/mol.                                   |
| 203 | vsurf_Wp3  | Polar volume at -1.0 kcal/mol.                                   |
| 204 | vsurf_Wp4  | Polar volume at -2.0 kcal/mol.                                   |
| 205 | vsurf_Wp5  | Polar volume at -3.0 kcal/mol.                                   |
| 206 | vsurf_Wp6  | Polar volume at -4.0 kcal/mol.                                   |
| 207 | Weight     | Molecular weight.                                                |
| 208 | weinerPath | Wiener path number.                                              |
| 209 | weinerPol  | Wiener polarity number.                                          |
| 210 | zagreb     | Zagreb index: the sum of $d_i^2$ over all heavy atoms $i$ .      |

<sup>a</sup> Calculated at pH 7.2 with Marvin software (ChemAxon).
